# Supplementary material for: Exploration of the cofactor specificity of wild-type phosphite dehydrogenase and its mutant using molecular dynamics simulations
Source: Royal Society of Chemistry journal article supplement (doi:10.1039/d1ra00221j), 2021-01-01
Supplement: d1ra00221j1.pdf [file d1ra00221j1.pdf]

## Figure S1

### (a) WT Pdh\_NCD

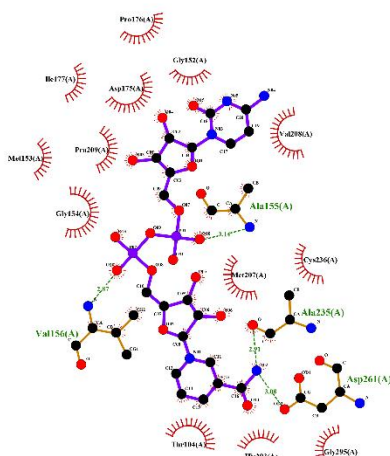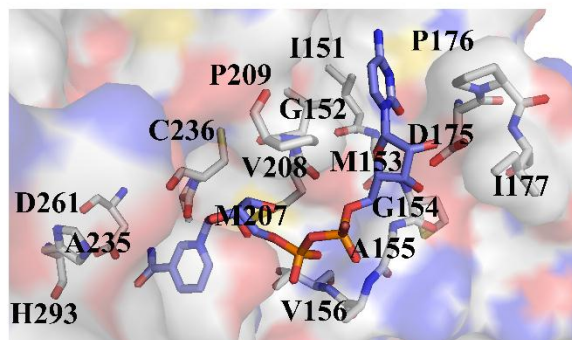

### (b) MT Pdh\_NCD

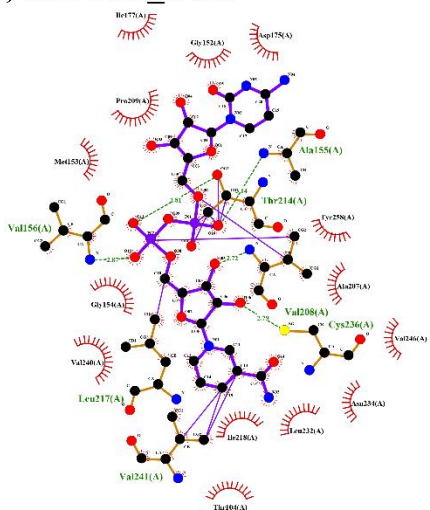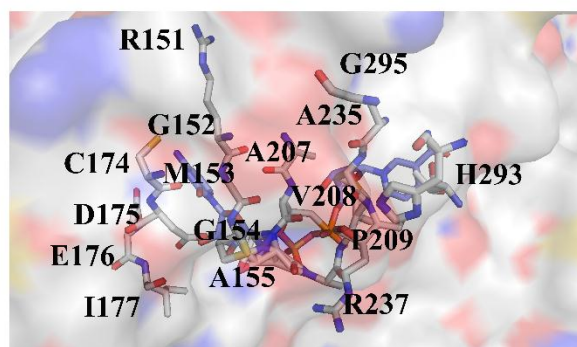

Figure S1 The surrounding residues of Pdh\_NCD. (a) the surrounding residues of WT Pdh\_NCD, (b) the surrounding residues of MT Pdh\_NCD.

**Figure S2**

**(a) WT Pdh**

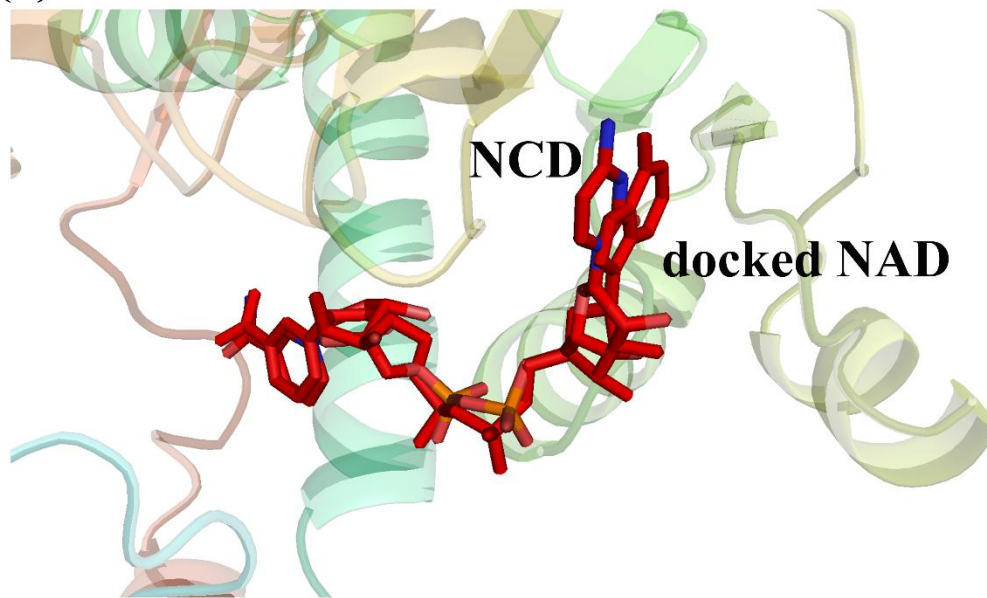

**(b) MT Pdh**

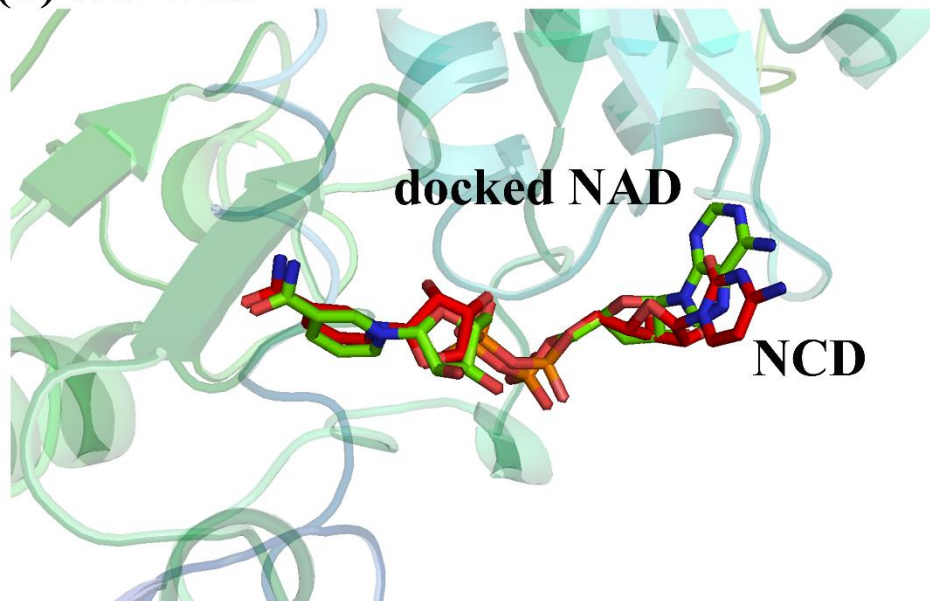

Figure S2 Comparison of NAD's docking results with the original position. (a) the position of docked NAD and NCD in WT Pdh, (b) the position of docked NAD and NCD in MT Pdh.
